# Supplementary material for: Parthenogenetic activation of bovine oocytes using bovine and murine phospholipase C zeta
Source: Springer Nature journal article supplement (doi:10.1186/1471-213x-8-16), 2008-02-19

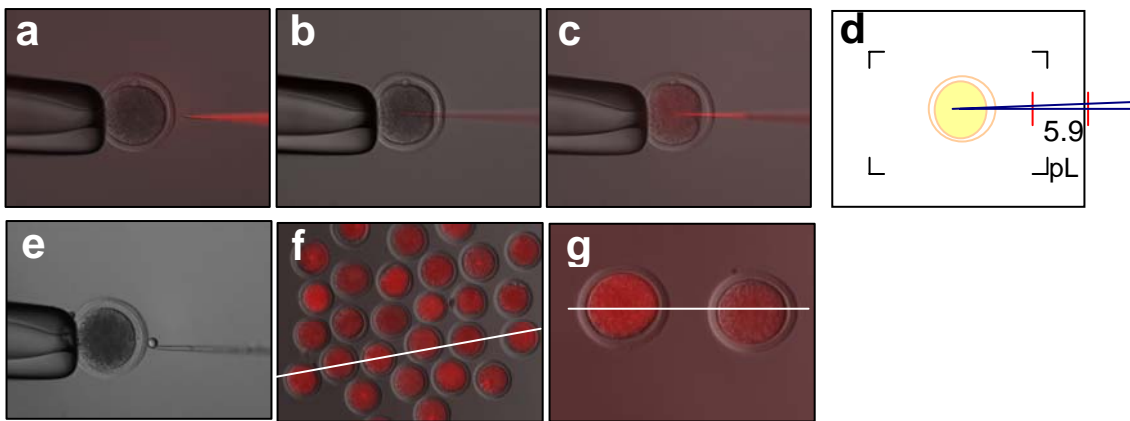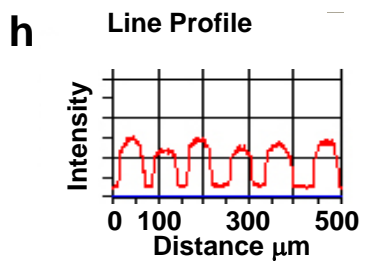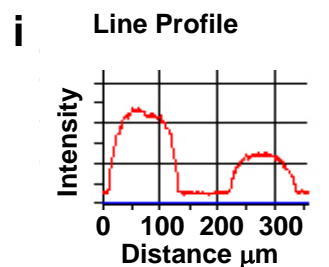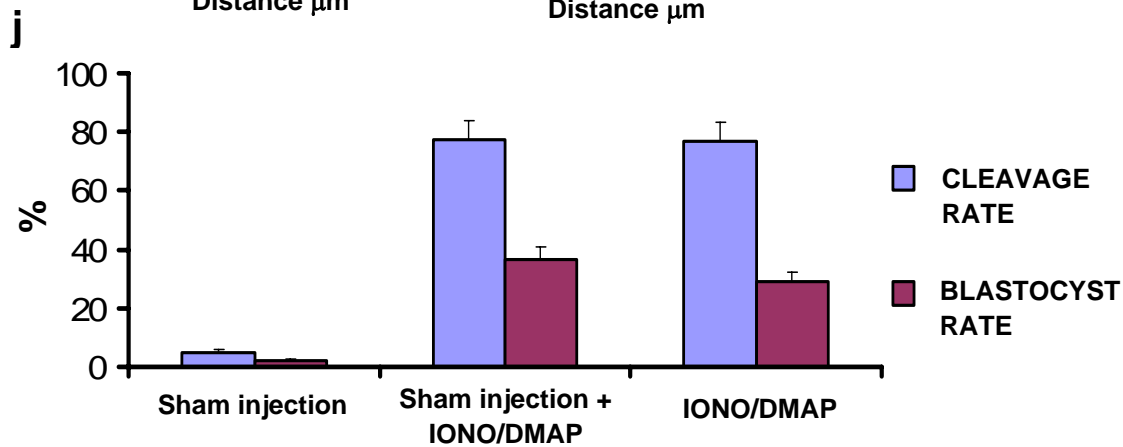

Supplement: 12861_2007_300_MOESM1_ESM.pdf [file 12861_2007_300_MOESM1_ESM.pdf]
