# Supplementary material for: Parthenogenetic activation of bovine oocytes using bovine and murine phospholipase C zeta
Source: Springer Nature journal article supplement (doi:10.1186/1471-213x-8-16), 2008-02-19
Supplement: 12861_2007_300_MOESM2_ESM.pdf [file 12861_2007_300_MOESM2_ESM.pdf]

**a** Mouse PLCZ1 - 6 replicates (1028 oocytes)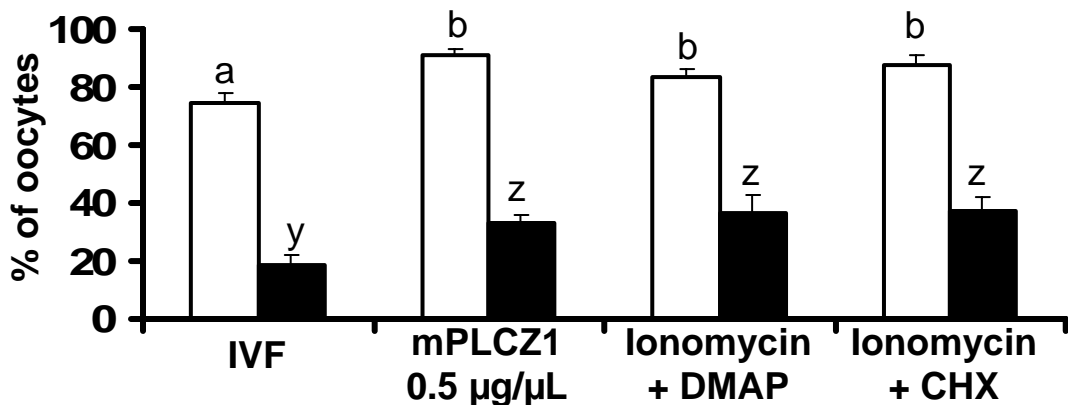**Bovine PLCZ1 - 7 replicates (1187 oocytes)**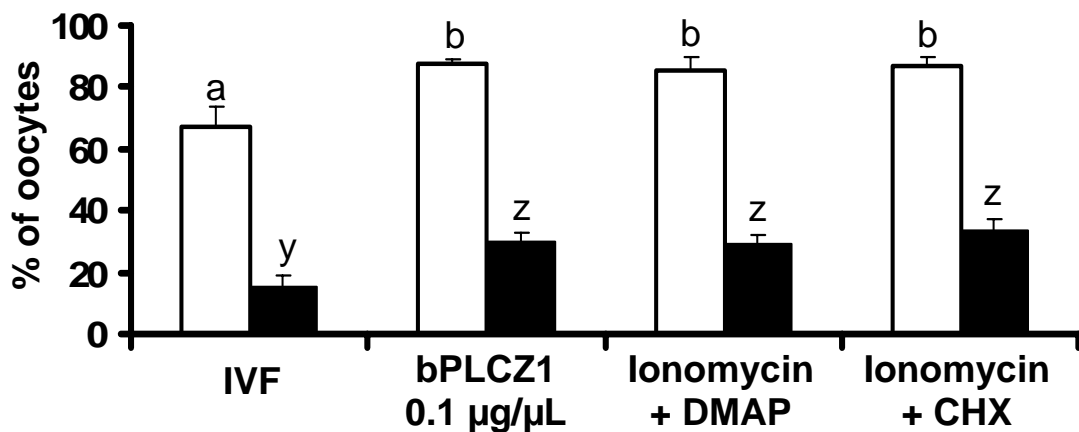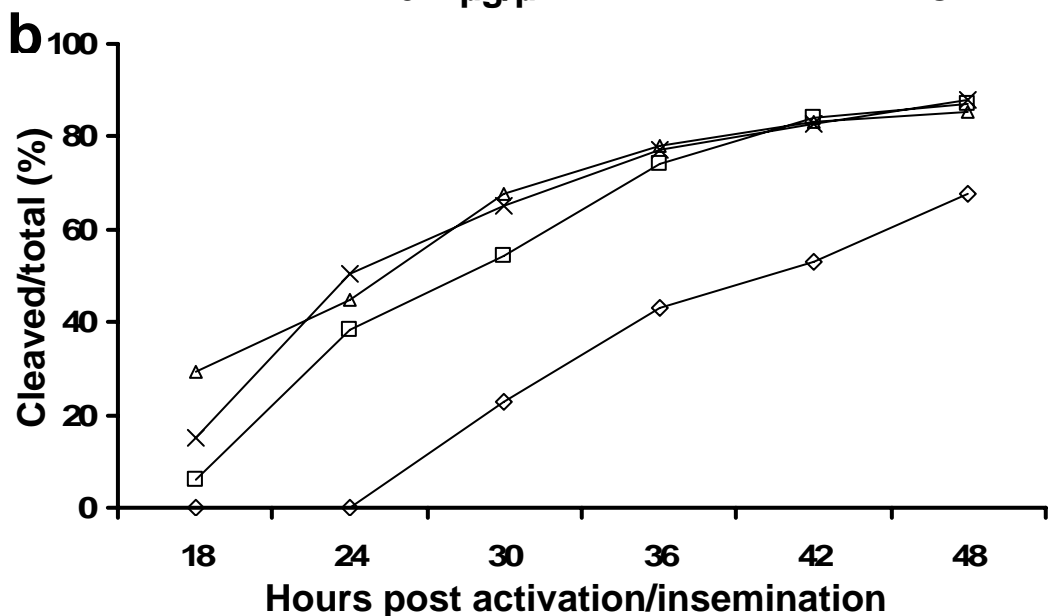

—◇— IVF —□— Iono/CHX —△— Iono/DMAP —×— bPLCZ1
