# Supplementary material for: Parthenogenetic activation of bovine oocytes using bovine and murine phospholipase C zeta
Source: Springer Nature journal article supplement (doi:10.1186/1471-213x-8-16), 2008-02-19

**a****1  $\mu\text{g}/\mu\text{L}$  bPLCZ1**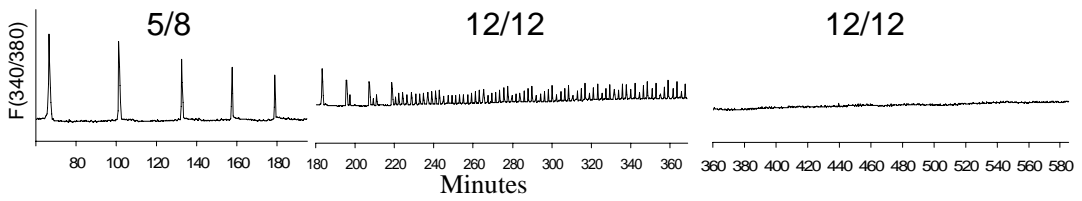**0.1  $\mu\text{g}/\mu\text{L}$  bPLCZ1**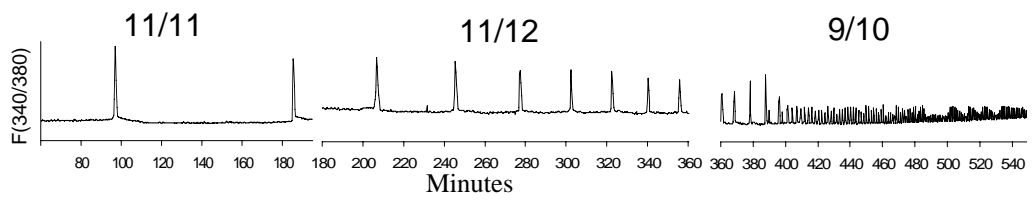**1  $\mu\text{g}/\mu\text{L}$  mPLCZ1**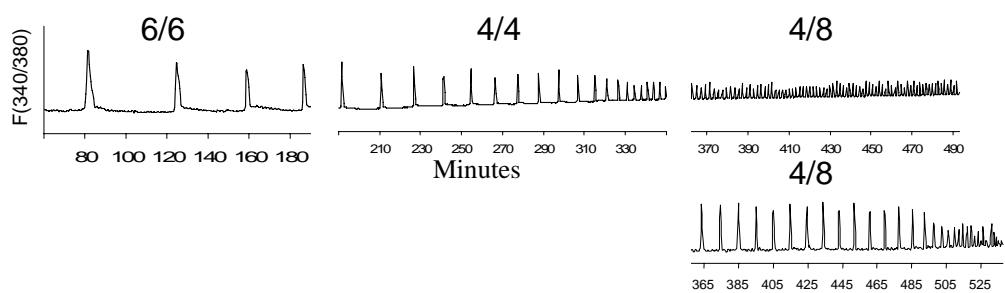**b****Time of last  $\text{Ca}^{2+}$  spike with interspike interval  $> 3$  min**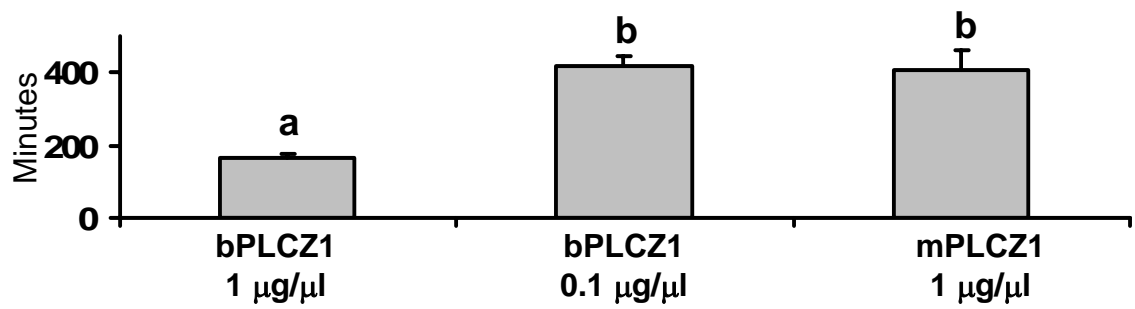

Supplement: 12861_2007_300_MOESM3_ESM.pdf [file 12861_2007_300_MOESM3_ESM.pdf]
